# Supplementary material for: Critical roles of nicotinic acetylcholine receptors in olfactory memory formation and retrieval in crickets
Source: Frontiers journal article supplement (doi:10.3389/fphys.2024.1345397), 2024-02-09
Supplement: Image_1.pdf [file Image_1.pdf]

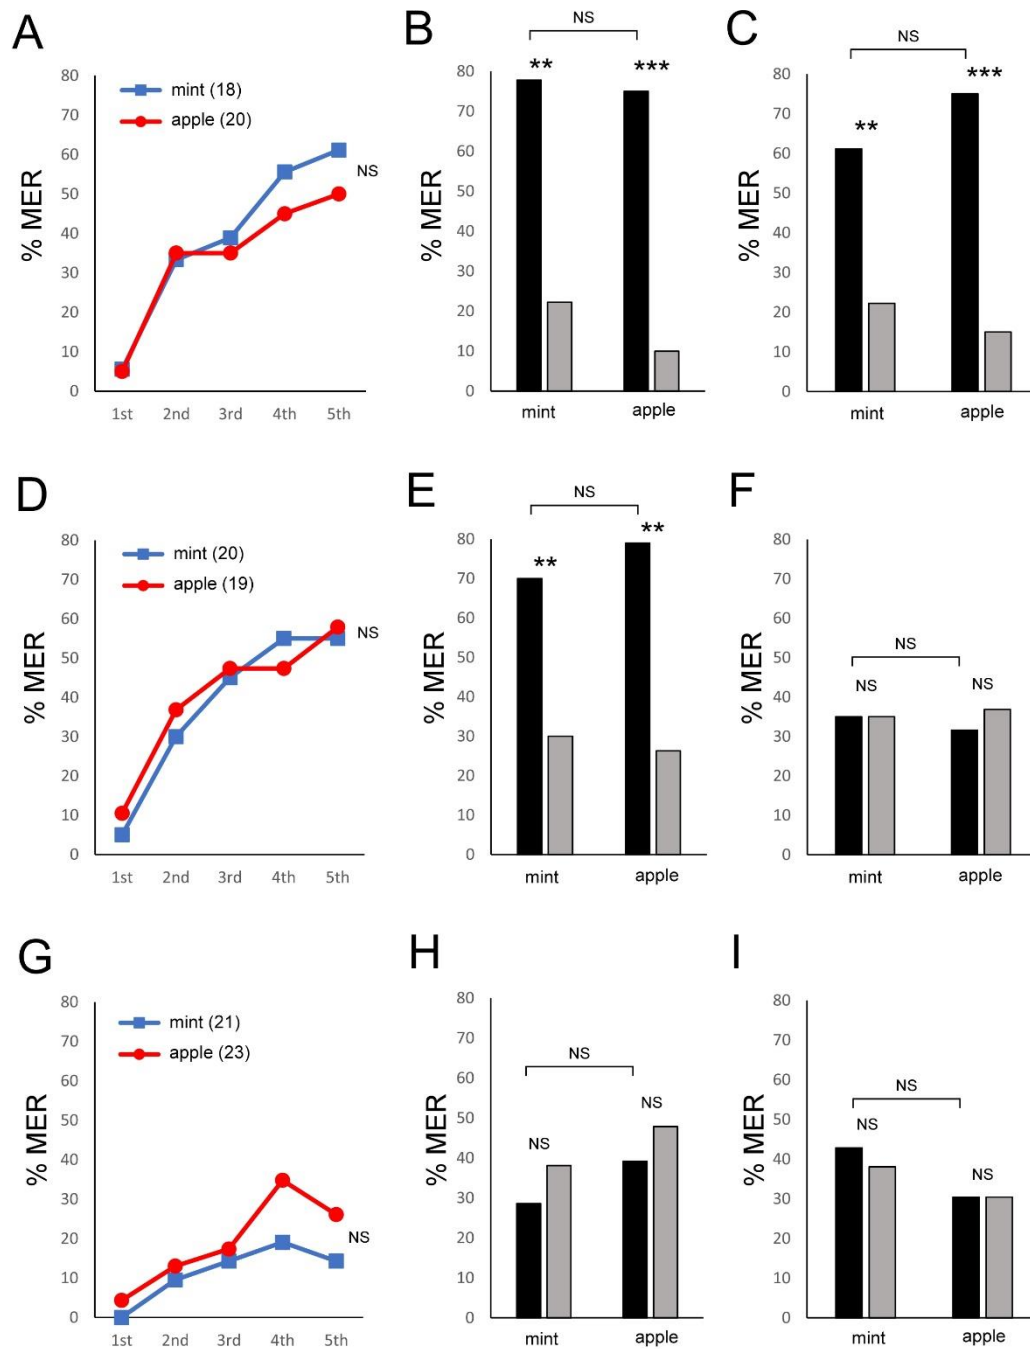

### Supplementary Figure S1. No odor bias in appetitive MER conditioning with peppermint CS and apple CS

At 20 min before appetitive conditioning, crickets in three groups were each injected with 3  $\mu$ L of saline (saline group: A-C), saline containing 100  $\mu$ M MLA (MLA group: D-F) or 1 mM MEC (MEC group: G-I). (A, D, G) Acquisition performance of appetitive

conditioning in the peppermint CS group and the apple CS group. The percentage of MER (%MER) during a 3-sec period of CS (peppermint or apple odor) presentation prior to US (water) presentation is shown. The number of animals tested is shown in parentheses. The %MER to the peppermint odor (blue) or apple odor (red) in the saline group (**A**) was less than 10% in the first trial (i.e., immediately before the first CS-US pairing trial), but it increased to more than 50% in the fifth trial (after the fourth trial). The increase in %MER to the CS with an increase in the number of trials was statistically significant (repeated measures ANOVA,  $df=4$ ,  $P=0.0045$  in peppermint CS group,  $P=0.0260$  in apple CS group). While the results in the MLA injected group were similar to the control group (repeated measures ANOVA,  $df=4$ ,  $P=0.0034$  in peppermint CS group,  $P=0.0328$  in apple CS group), the MEC group did not show a significant increase in %MER to the CS with an increase in the number of trials (repeated measures ANOVA,  $df=4$ ,  $P=0.3731$  in peppermint CS group,  $P=0.0840$  in apple CS group). To add, in all three injection groups, %MER to the CS did not significantly differ between the peppermint CS group and the apple CS group (Fisher's exact test,  $P>0.05$ ). Thus, data from the two groups were pooled in Figure. 2A. (**B, E, H**) Retention performance at around 10 min after conditioning. In the retention test, each cricket was tested with the CS and the novel odor separated by a 4-min interval. The saline group (**B**) and MLA group (**E**) exhibited a significantly higher %MER to the CS (black bars) than that to the novel odor (gray bars), indicating that the memory is CS-specific. In contrast, in the MEC group (**H**), %MER to the CS was as low as that to the novel odor, indicating no CS-specific short-term memory (STM). (**C, F, I**) Retention performance at 1 day after conditioning. The saline group (**C**) exhibited a significantly higher %MER to the CS (black bar) than that to the novel odor (gray bar), indicating that the memory is CS-specific. In contrast, in the MLA group (**F**)

and the MEC group (I), %MER to the CS was as low as that to the novel odor, indicating no CS-specific LTM. Within each of the injection groups (saline, MLA, or MEC), there were no significant differences between the peppermint CS group and the apple CS group (Fisher's exact test,  $P > 0.05$ ). Thus, the data from the two CS groups were pooled in Figure 2B, C. A repeated measures ANOVA was used for within-group comparison of %MER during acquisition. McNemar's test was used for pairwise comparison of %MER between the CS and the novel odor in the retention test. Fisher's exact test was used for pairwise comparison of %MER of different groups in each conditioning trial. The results of statistical comparisons are shown by asterisks (\*\*\*  $P < 0.001$ , \*\*  $P < 0.01$ , NS  $P > 0.05$ ).
